# Supplementary material for: Preparation and Characterization of Gelatin Nanofibers Containing Silver Nanoparticles
Source: PubMed Central journal article supplement (PMC4013666; doi:10.3390/ijms15046857), 2014-04-22

## Supplementary Information

**Figure S1.** UV-vis absorption spectra of silver tetrafluoroborate in acidic solution: (a) F100; (b) F70W30; (c) F50W50; (d) F30W70; (e) W100.

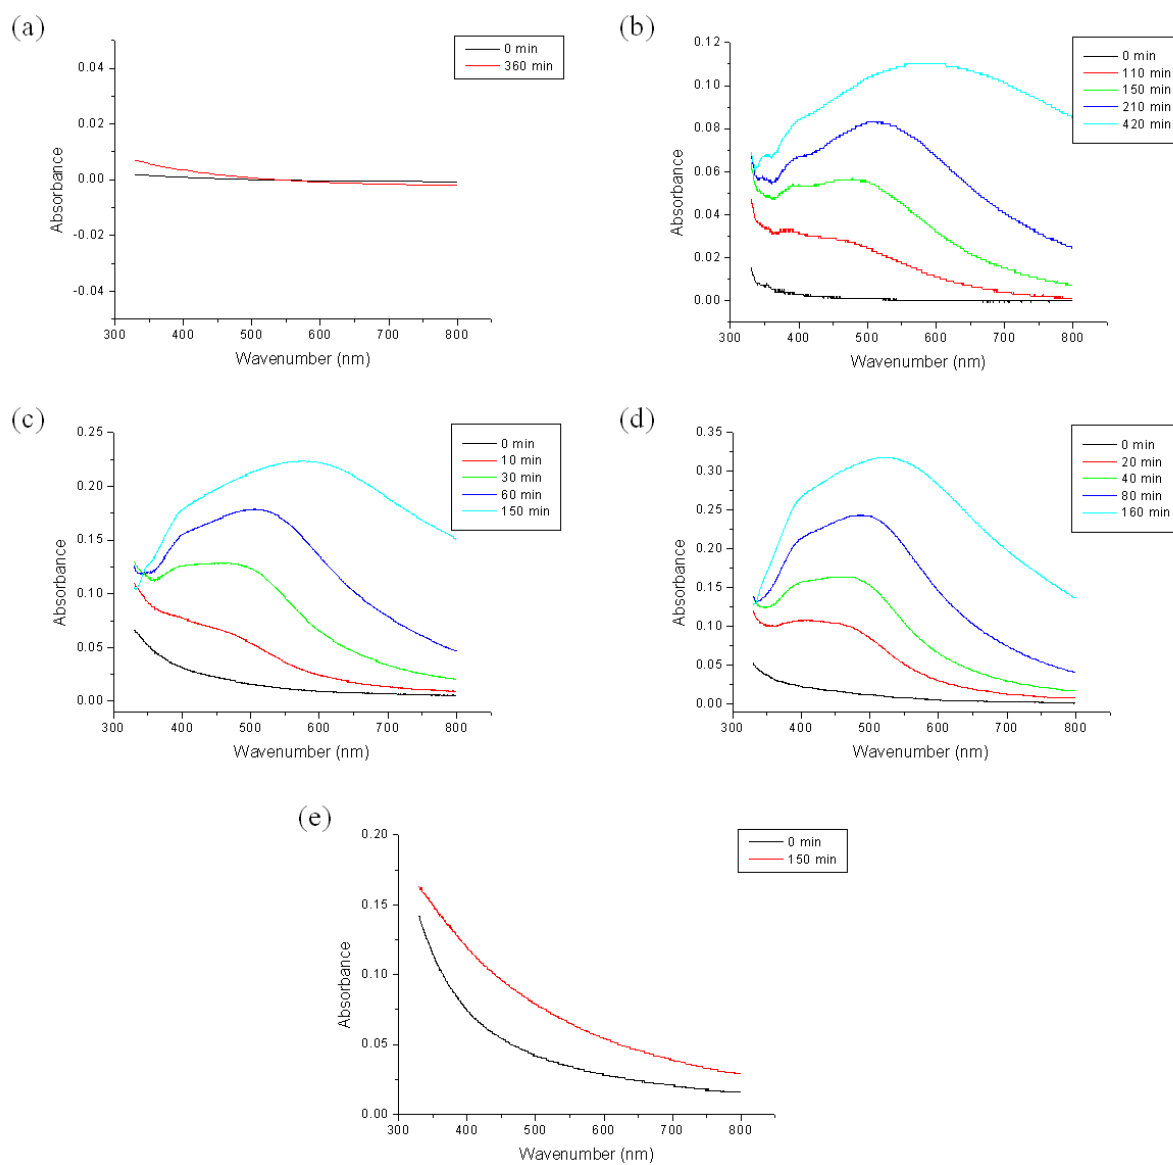

**Figure S2.** UV-vis absorption spectra of silver phosphate in acidic solution: (a) F100; (b) F70W30; (c) F50W50; (d) F30W70.

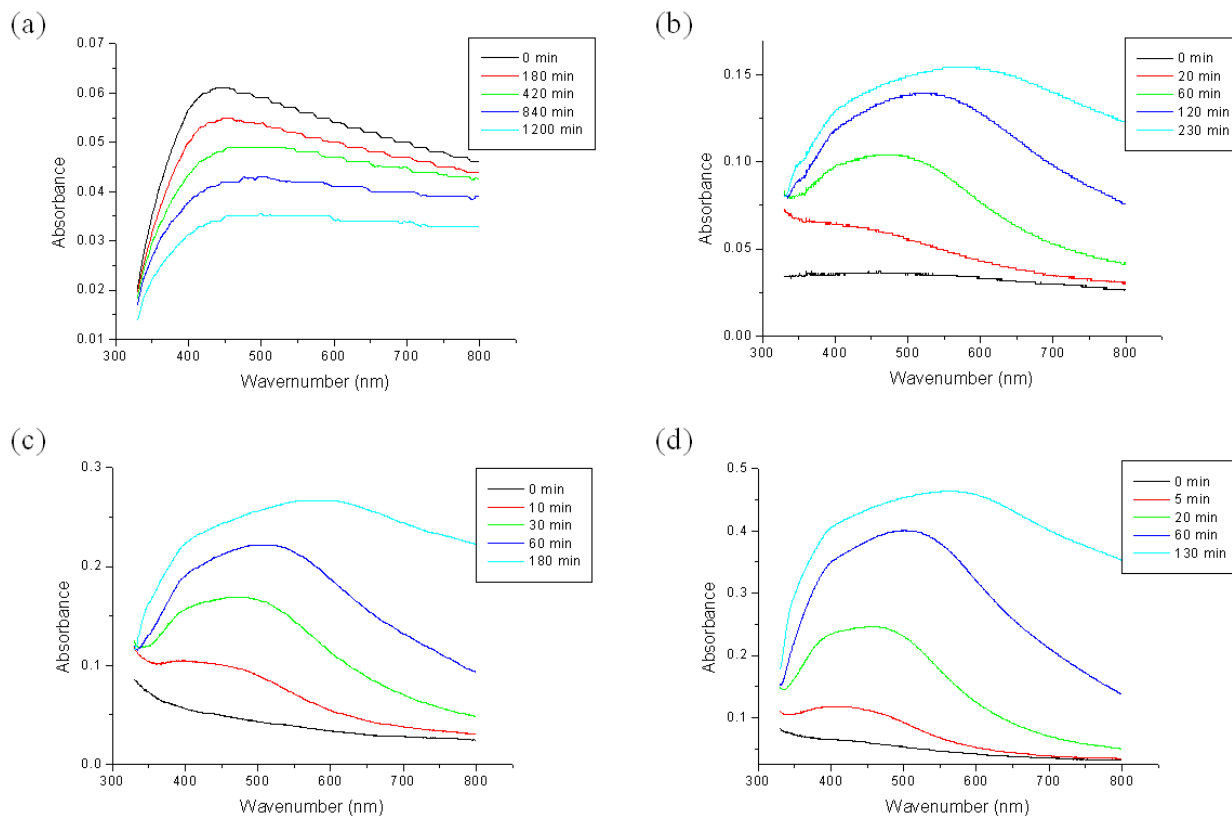

**Figure S3.** Conductivity of Ag precursor dissolved in acidic solutions: (a) silver acetate; (b) silver tetrafluoroborate; (c) silver nitrate; (d) silver phosphate.

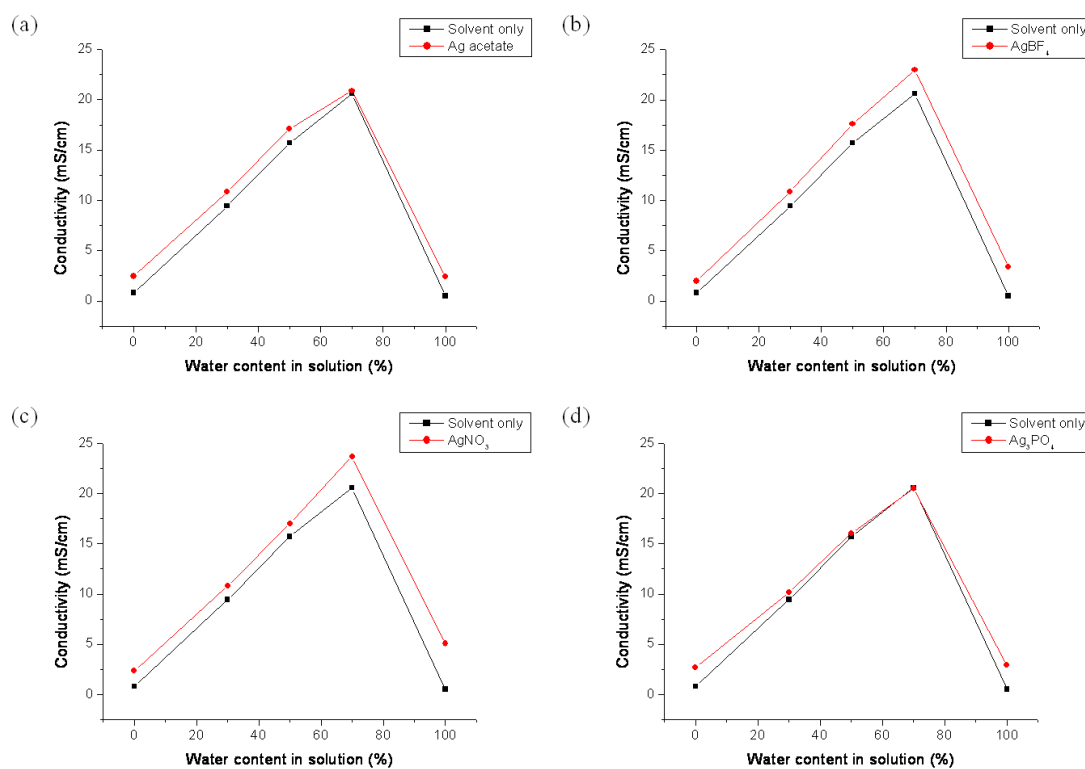

**Figure S4.** Particle size distributions of Ag nanoparticles in acidic solution: (a) F100; (b) F70W30; (c) F50W50; (d) gelatin/F30W70; (e) gelatin/F100; (f) gelatin/F70W30; (g) gelatin/F50W50; (h) gelatin/F30W70.

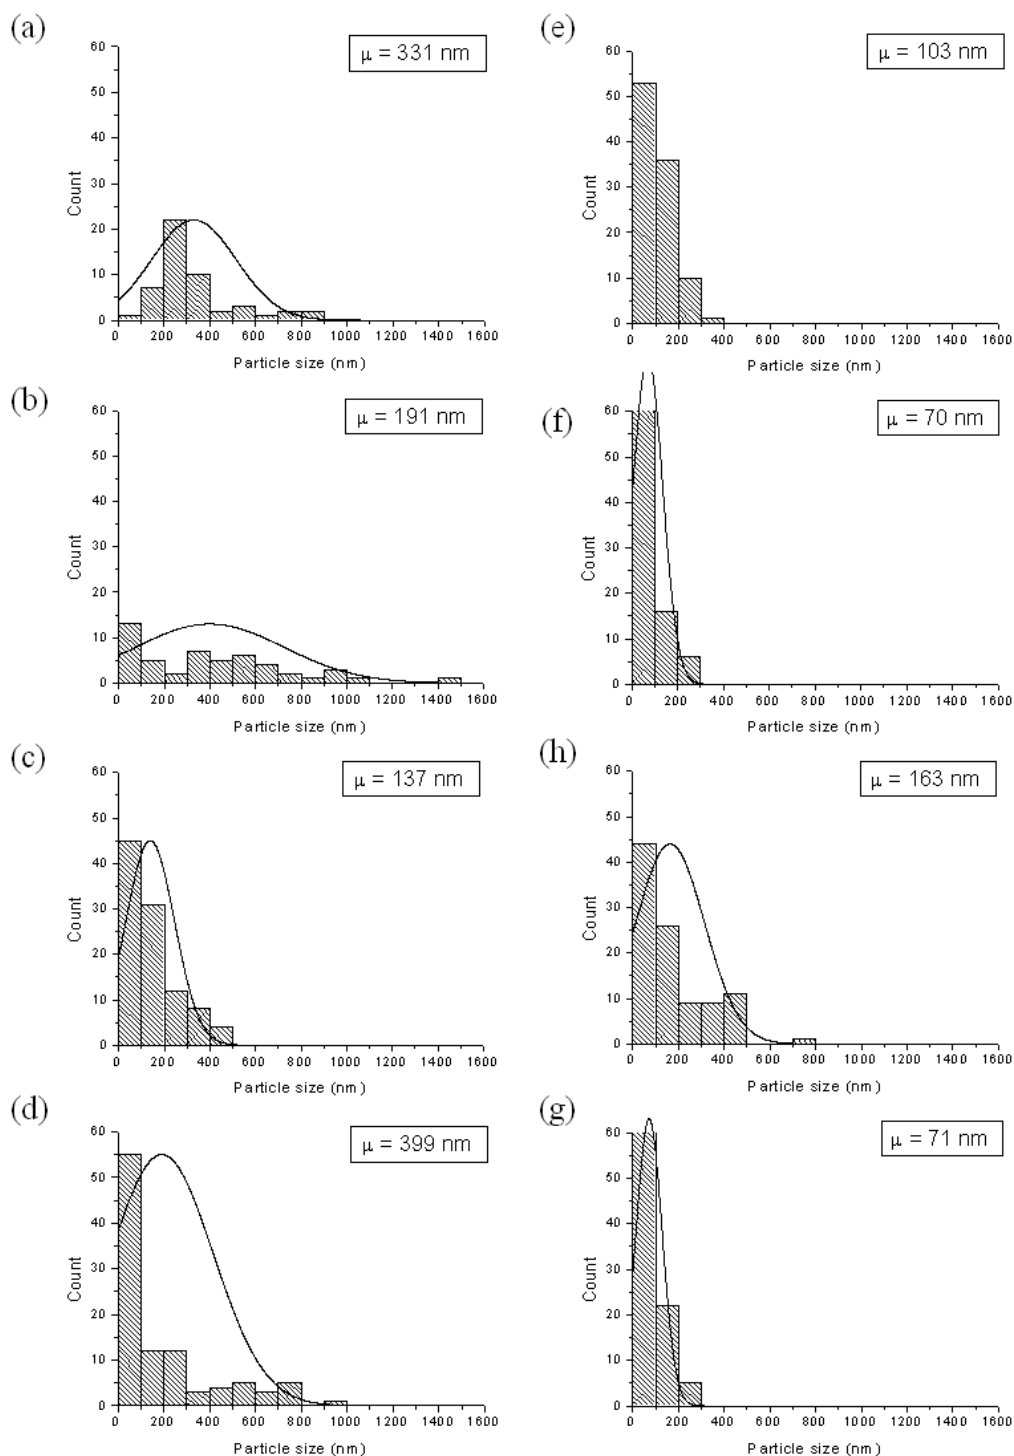

Supplement: ijms-15-06857-s001.pdf [file ijms-15-06857-s001.pdf]
